# Supplementary material
Source: PubMed Central journal article supplement (PMC8231442)
Supplement: aem00227-21_supp_1_seq6.pdf [file aem00227-21_supp_1_seq6.pdf]

Supplementary files of

**Horizontal Gene Transfer of Genes Encoding Copper-Containing Membrane-Bound Monooxygenase (CuMMO) and Soluble Di-iron Monooxygenase (SDIMO) in Ethane- and Propane-Oxidizing *Rhodococcus* Bacteria**

Bin Zou<sup>a</sup>, Ying Huang<sup>a</sup>, Pan-Pan Zhang<sup>a</sup>, Xiao-Ming Ding<sup>a</sup>, Huub J.M. Op den Camp<sup>b</sup>, Zhe-Xue Quan<sup>a,c,\*</sup>

<sup>a</sup>Ministry of Education Key Laboratory for Biodiversity Science and Ecological Engineering, Institute of Biodiversity Science, School of Life Sciences, Fudan University, Shanghai, China

<sup>b</sup>Department of Microbiology, Radboud University, Nijmegen, Netherlands

<sup>c</sup>Shanghai Engineering Research Center of Industrial Microorganisms, School of Life Sciences, Fudan University, Shanghai, China

\*Address correspondence to Zhe-Xue Quan, [quanzx@fudan.edu.cn](mailto:quanzx@fudan.edu.cn)

Table S1 Growth of strains on different substrates

| Substrate <sup>1</sup> | ZPP                   | ZPP<br>( $\Delta$ <i>smoXYB1C1Z-hmoCAB</i> ) | <i>R. erythropolis</i> ATCC 25544<br>(pRZP1) | <i>R. erythropolis</i><br>ATCC 25544 |
|------------------------|-----------------------|----------------------------------------------|----------------------------------------------|--------------------------------------|
| Methane                | - <sup>2</sup> (10 d) | n.a. <sup>3</sup>                            | n.a.                                         | n.a.                                 |
| Methanol               | - (10 d)              | - (10 d)                                     | - (10 d)                                     | - (10 d)                             |
| Ethanol                | 0.71±0.02 (5 d)       | 0.28±0.05 (5 d)                              | 0.36±0.03 (5 d)                              | 0.14±0.19 (5 d)                      |
| 1-propanol             | 1.11±0.01 (5 d)       | 0.66±0.12 (5 d)                              | 0.59±0.04 (5 d)                              | 0.35±0.03 (5 d)                      |
| 2-propanol             | 0.77±0.02 (8 d)       | 0.14±0.00 (8 d)                              | - (10 d)                                     | - (10 d)                             |

<sup>1</sup>The consumption of methane was measured by gas chromatography. The consumption of methanol, ethanol, 1-propanol, and 2-propanol was measured through growth of cells at OD<sub>600</sub>.

<sup>2</sup>- means no consumption or growth was measured, compared with the blank controls.

<sup>3</sup>n.a. (not applicable) means no data provided.

Table S2 Representative *IS* elements in pRZP1 and homologous regions of other seven plasmids

| Strain                                   | Annotation                    | Identity  | Identity Rate | Query Start | Query End | Subject strand |
|------------------------------------------|-------------------------------|-----------|---------------|-------------|-----------|----------------|
| ZPP plasmid pRZP1<br>(CP058640)          | <i>/SRjo4 Family: IS256</i>   | 1311/1445 | 91%           | 65651       | 67093     | Minus          |
|                                          | <i>/SRjo4 Family: IS256</i>   | 1311/1445 | 91%           | 68606       | 70048     | Plus           |
|                                          | <i>/SRjo1 Family: IS1380</i>  | 1473/1694 | 87%           | 98851       | 100534    | Minus          |
|                                          | <i>/SRjo4 Family: IS256</i>   | 1311/1445 | 91%           | 102764      | 104206    | Minus          |
|                                          | <i>/SRhosp5 Family: IS3</i>   | 1164/1331 | 87%           | 104964      | 106282    | Minus          |
|                                          | <i>/SRhosp1 Family: IS3</i>   | 1185/1323 | 90%           | 109435      | 110754    | Plus           |
|                                          | <i>/SMpa1 Family: IS110</i>   | 285/349   | 82%           | 165650      | 165998    | Plus           |
|                                          | <i>/SMpa1 Family: IS110</i>   | 358/412   | 87%           | 166263      | 166674    | Plus           |
|                                          | <i>/SRhosp5 Family: IS3</i>   | 1164/1331 | 87%           | 172458      | 173776    | Minus          |
|                                          | <i>/IS1164 Family: IS256</i>  | 1090/1310 | 83%           | 191152      | 192456    | Plus           |
|                                          | <i>/SRhosp5 Family: IS3</i>   | 1164/1332 | 87%           | 194048      | 195367    | Minus          |
|                                          | <i>/SRhosp2 Family: IS701</i> | 287/319   | 90%           | 205051      | 205367    | Minus          |
|                                          | <i>/SRjo4 Family: IS256</i>   | 1311/1445 | 91%           | 207559      | 209001    | Minus          |
|                                          | <i>/SRhosp1 Family: IS3</i>   | 1209/1321 | 92%           | 225623      | 226940    | Minus          |
|                                          | <i>/SRhosp5 Family: IS3</i>   | 391/422   | 93%           | 231550      | 231970    | Plus           |
| <i>/SRhosp5 Family: IS3</i>              | 565/601                       | 94%       | 236159        | 236758      | Plus      |                |
| B4 plasmid pROB01<br>(AP011116)          | <i>/SRhosp1 Family: IS3</i>   | 317/326   | 97%           | 41325       | 41650     | Minus          |
|                                          | <i>/SRhosp1 Family: IS3</i>   | 817/841   | 97%           | 46753       | 47590     | Minus          |
|                                          | <i>/SRhosp1 Family: IS3</i>   | 205/213   | 96%           | 48717       | 48929     | Minus          |
|                                          | <i>/SRop2 Family: ISAzo13</i> | 2171/2171 | 100%          | 75197       | 77367     | Minus          |
| RHA1 plasmid pRHL2<br>(CP000433)         | <i>/SRjo2 Family: IS630</i>   | 1100/1147 | 96%           | 75996       | 77142     | Minus          |
|                                          | <i>/SRjo1 Family: IS1380</i>  | 610/715   | 85%           | 95394       | 96102     | Plus           |
|                                          | <i>/SRhosp2 Family: IS701</i> | 244/292   | 84%           | 114418      | 114706    | Plus           |
| R7 plasmid pPDG3<br>(CP008950)           | <i>/SArsp6 Family: Tn3</i>    | 202/235   | 86%           | 119086      | 119320    | Plus           |
|                                          | <i>/SRhosp5 Family: IS3</i>   | 1211/1334 | 91%           | 126537      | 127865    | Minus          |
| S2-17 plasmid pRB29<br>(CP021356)        | <i>/IS1164 Family: IS256</i>  | 690/815   | 85%           | 212226      | 213040    | Plus           |
|                                          | <i>/SRop2 Family: ISAzo13</i> | 2128/2171 | 98%           | 213049      | 215219    | Plus           |
|                                          | <i>/IS1164 Family: IS256</i>  | 288/348   | 83%           | 215282      | 215629    | Plus           |
|                                          | <i>/SMav1 Family: IS21</i>    | 283/332   | 85%           | 237792      | 238123    | Minus          |
| NJ-530 plasmid<br>unnamed4<br>(CP034156) | <i>/STesp1 Family: IS3</i>    | 301/380   | 79%           | 162549      | 162926    | Minus          |
| WAY2 plasmid<br>pRWAY03<br>(CP046575)    | <i>/SMav1 Family: IS21</i>    | 300/356   | 84%           | 335748      | 336103    | Plus           |

*R. erythropolis* PR4 plasmid pREL1 (AP008931) has no representative *IS* elements in homologous regions.

Fig. S1

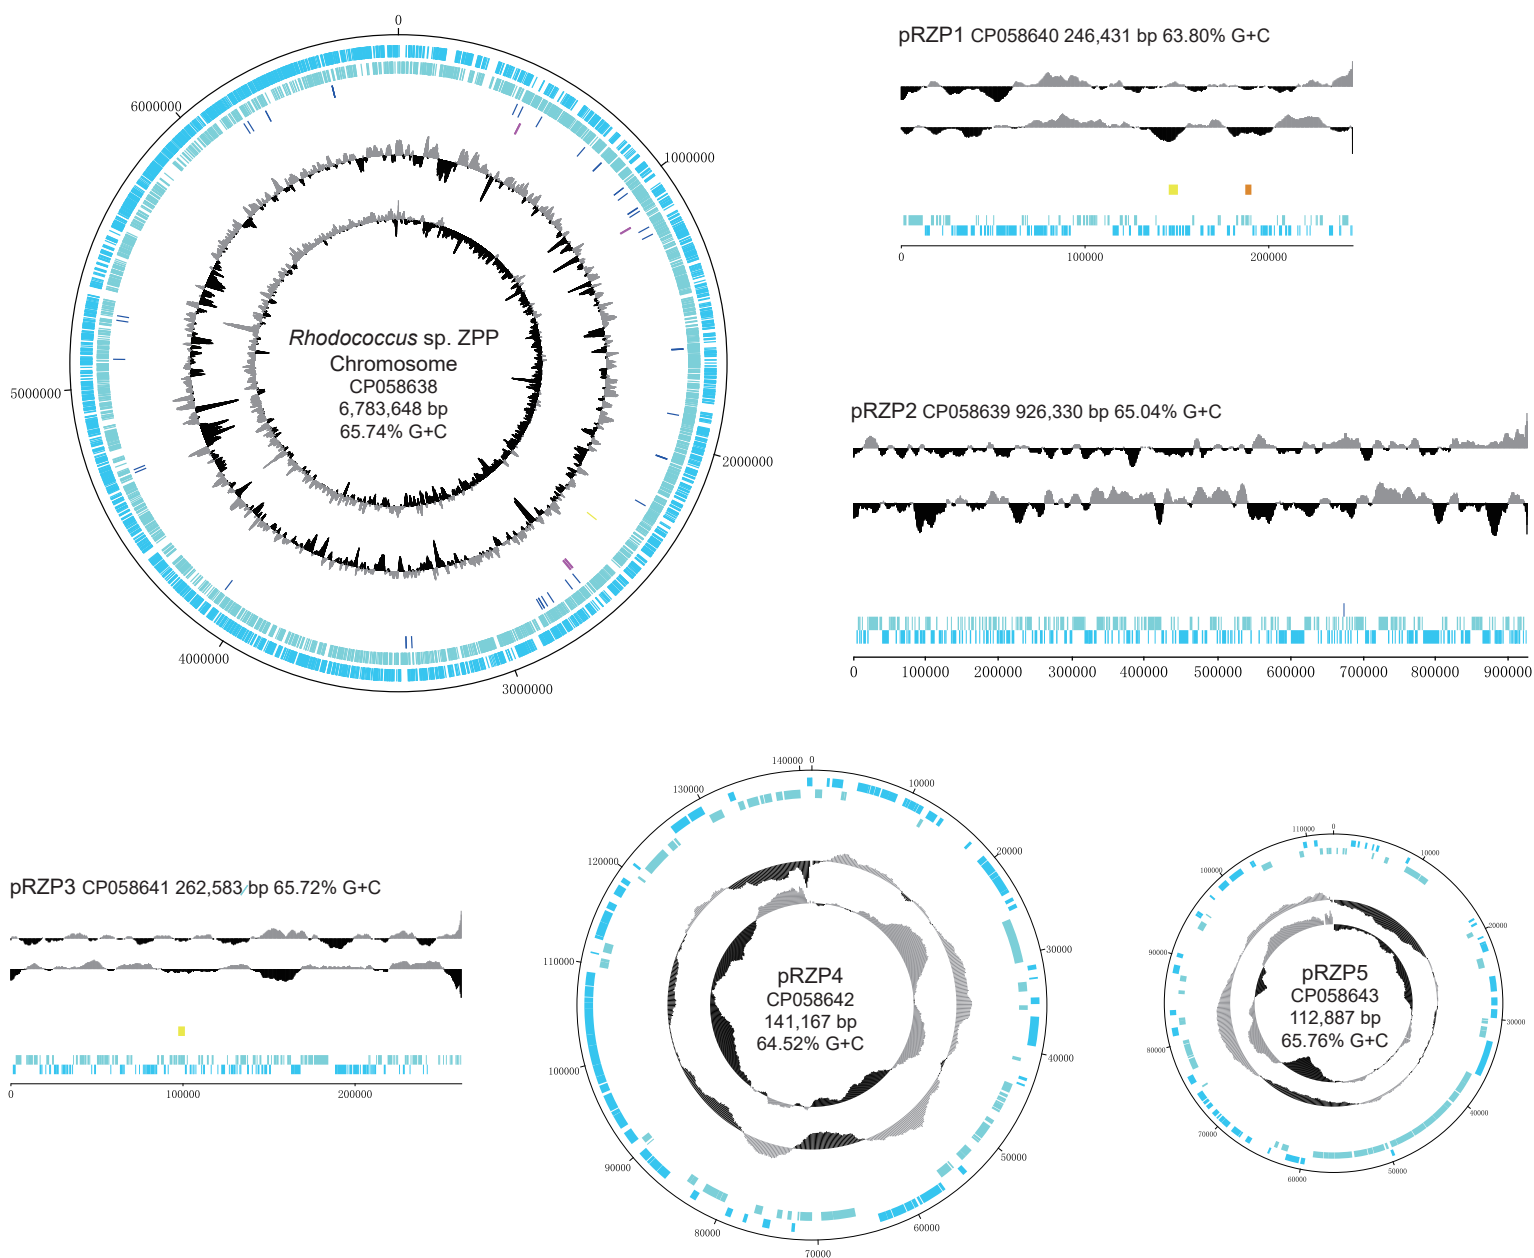

Fig. S1. Genomic map of *Rhodococcus* sp. ZPP replicons. Chromosome, linear mega-plasmids pRZP1, pRZP2, and pRZP3, and circular plasmids pRZP4 and pRZP5 are shown. The outer/bottom two rings/rows represent coding sequences in the forward and reverse strands. The third circle represents tRNA genes. The fourth circle represents rRNA genes. The fifth circle represents the operon of HmoCAB genes (orange on pRZP1), the operon of group 3-like SDIMO (yellow on pRZP1), the operon of group 5 SDIMO (yellow on chromosome), and the operon of group 6 SDIMO (yellow on pRZP3). the sixth circle/row represents deviation in G+C content, and the seventh circle/row represents the G+C skew.



Fig. S3

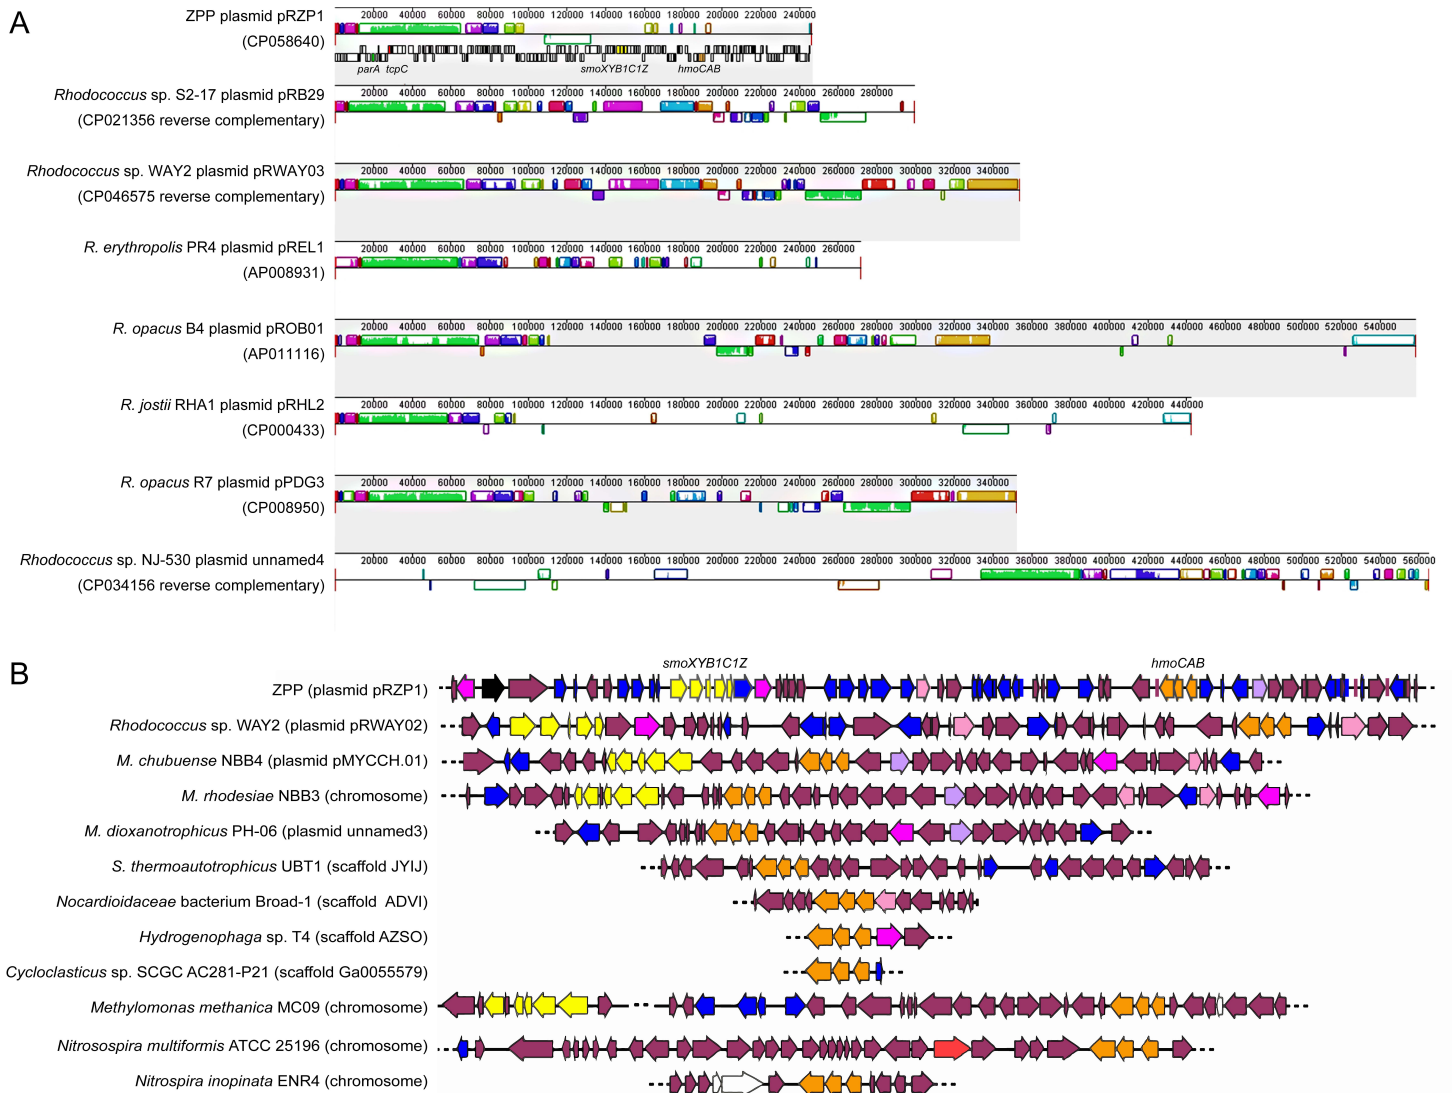

Fig. S3. The genomic alignment of eight plasmids in different strains of *Rhodococcus* (A) and the clusters of CuMMO and SDIMO genes in representative methane-, short-chain alkane-, and ammonia-oxidizing microbes (B). The alignment in (A) was performed using Mauve (1), and the homologous regions are in the same color. The thumbnail of pRZP1 annotation are drawn below the homologous region of pRZP1, and *parA*, *tcpC*, *smoXYB1C1Z* and *hmoCAB* are marked at the corresponding position. In (B), The SDIMO gene (*smoXYB1C1Z*) clusters are marked in yellow, and the CuMMO gene (*hmoCAB*, *amoCAB* and *pmoCAB*) clusters are marked in orange. The alcohol dehydrogenase genes (*adh*) are marked in light pink; the NDMA-dependent methanol dehydrogenase genes (*mdh*) are marked in purple; the aldehyde dehydrogenase genes (*aldh*) are marked in pink; the acetate-CoA ligase gene (*acs*) is marked in black; the periplasmic copper binding protein (*copCD*) is marked in white; the hydroxylamine oxidoreductase gene is marked in red and the mobile elements (including *IS* elements, transposases, and phages) are marked in blue.

Fig. S4

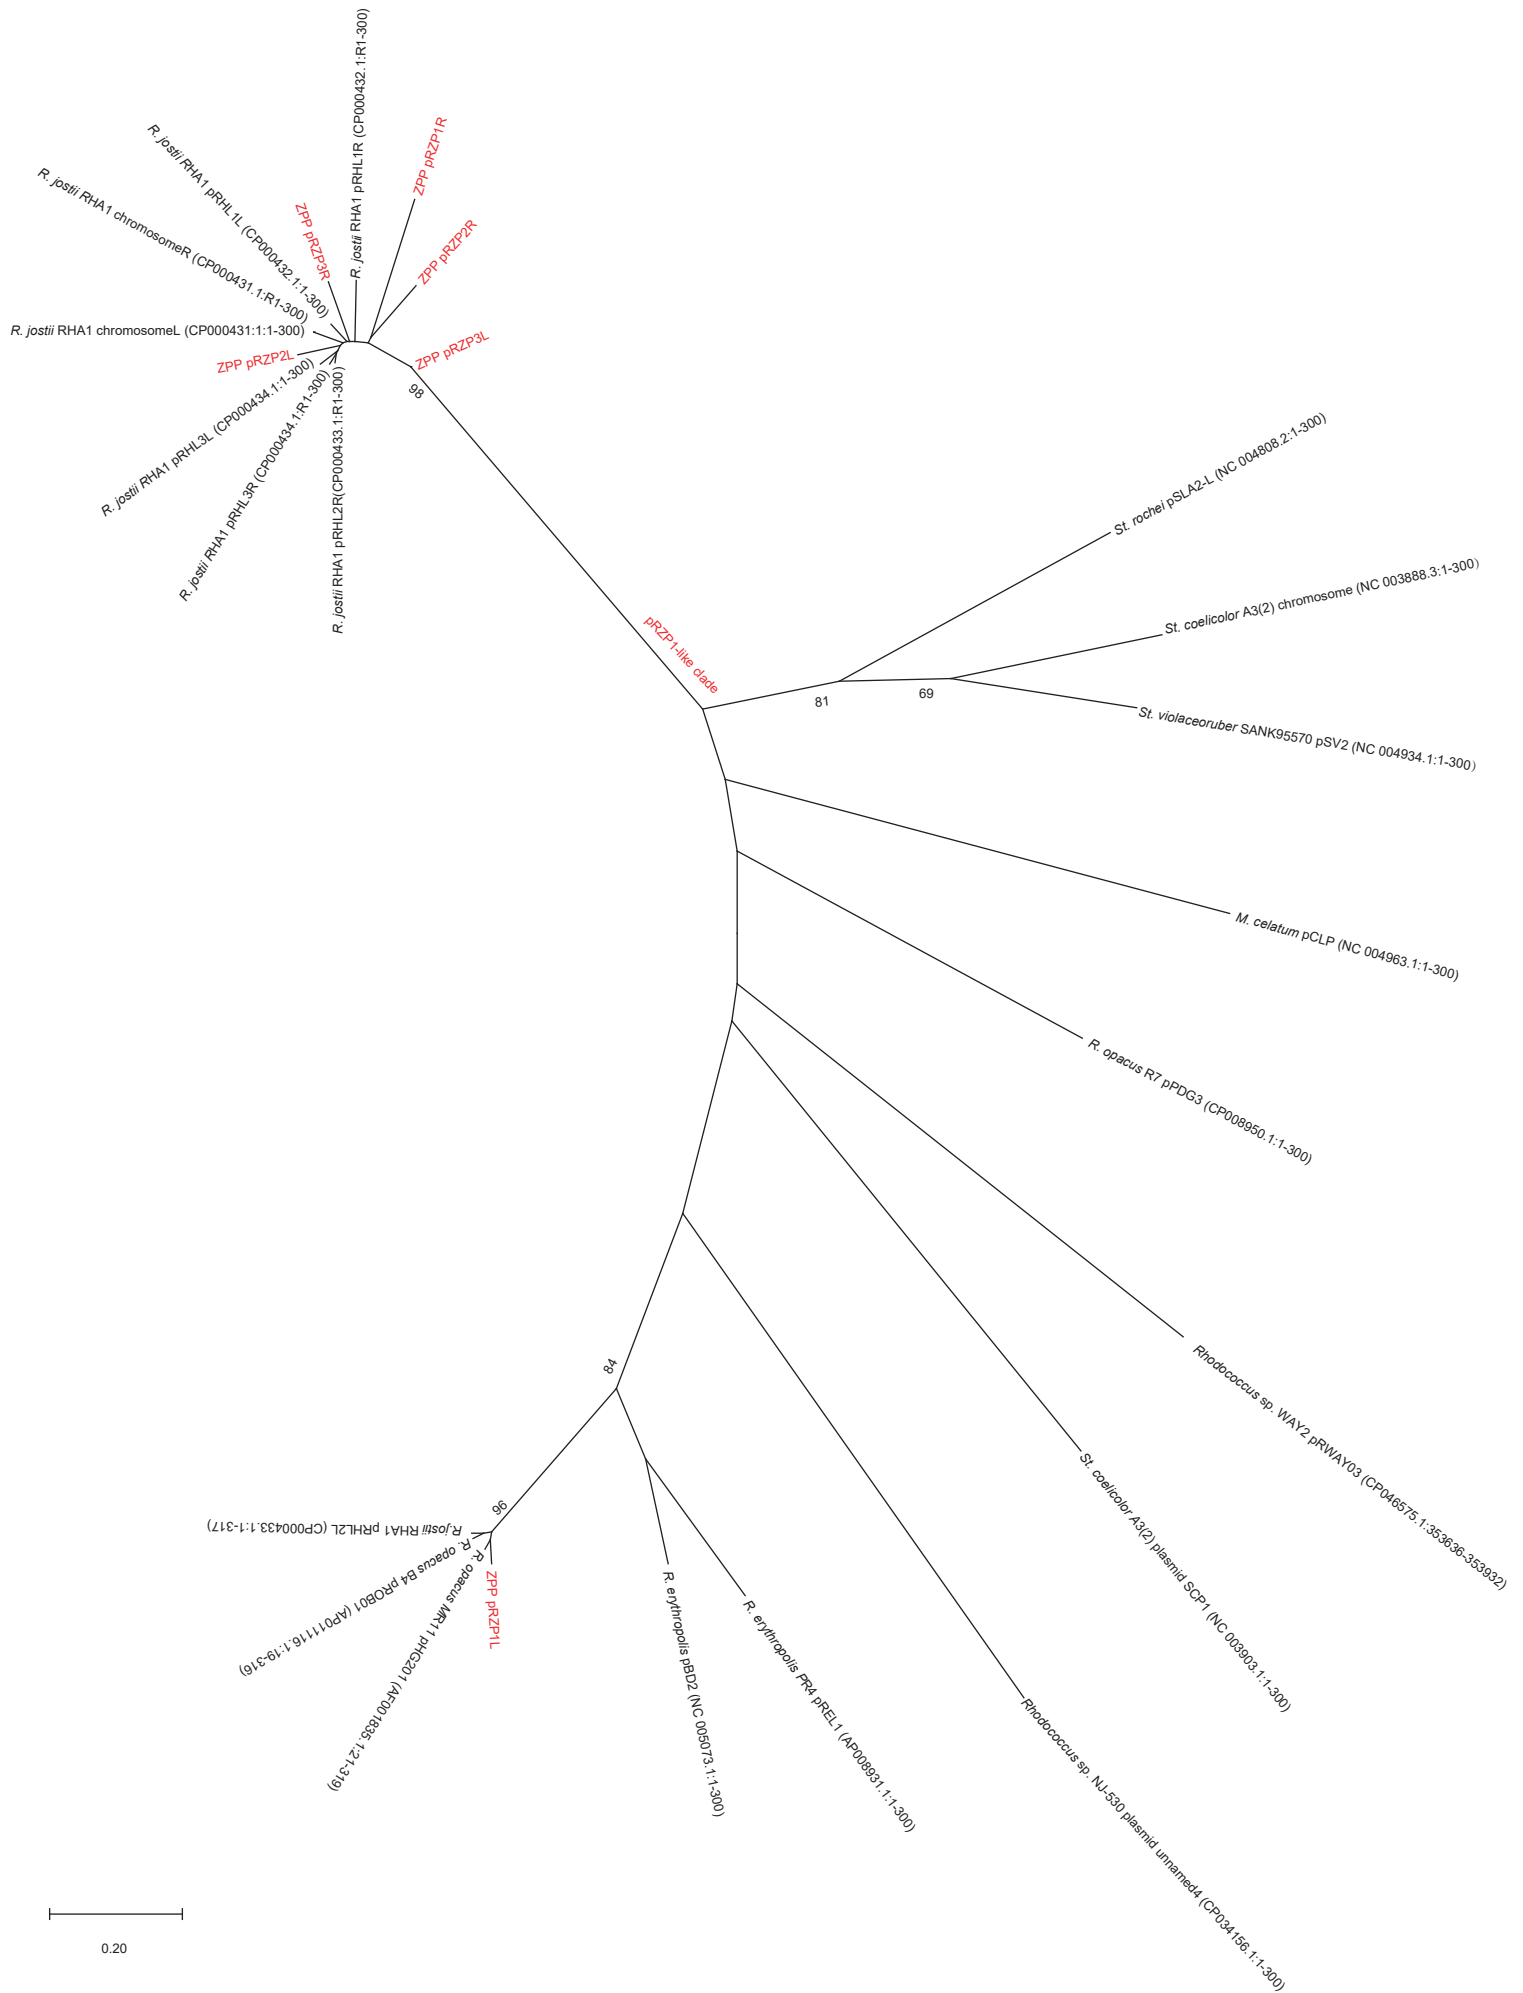

Fig. S4. Phylogenetic analysis of telomeres from linear replicons. The first 300-bp from telomeres were aligned using ClustalW with default parameters and a 500 bootstrapped maximum likelihood tree was constructed using MEGA X. The end of the replicon is designated with a subscript L for left end and R for right. Where the telomeres were identical or not resolved on the scale of this tree, right and left are not indicated. Nodes whose bootstraps  $\geq 60$  are shown. The tree was based on Supporting Figure 4 of a previous study (2).



Fig. S5

1

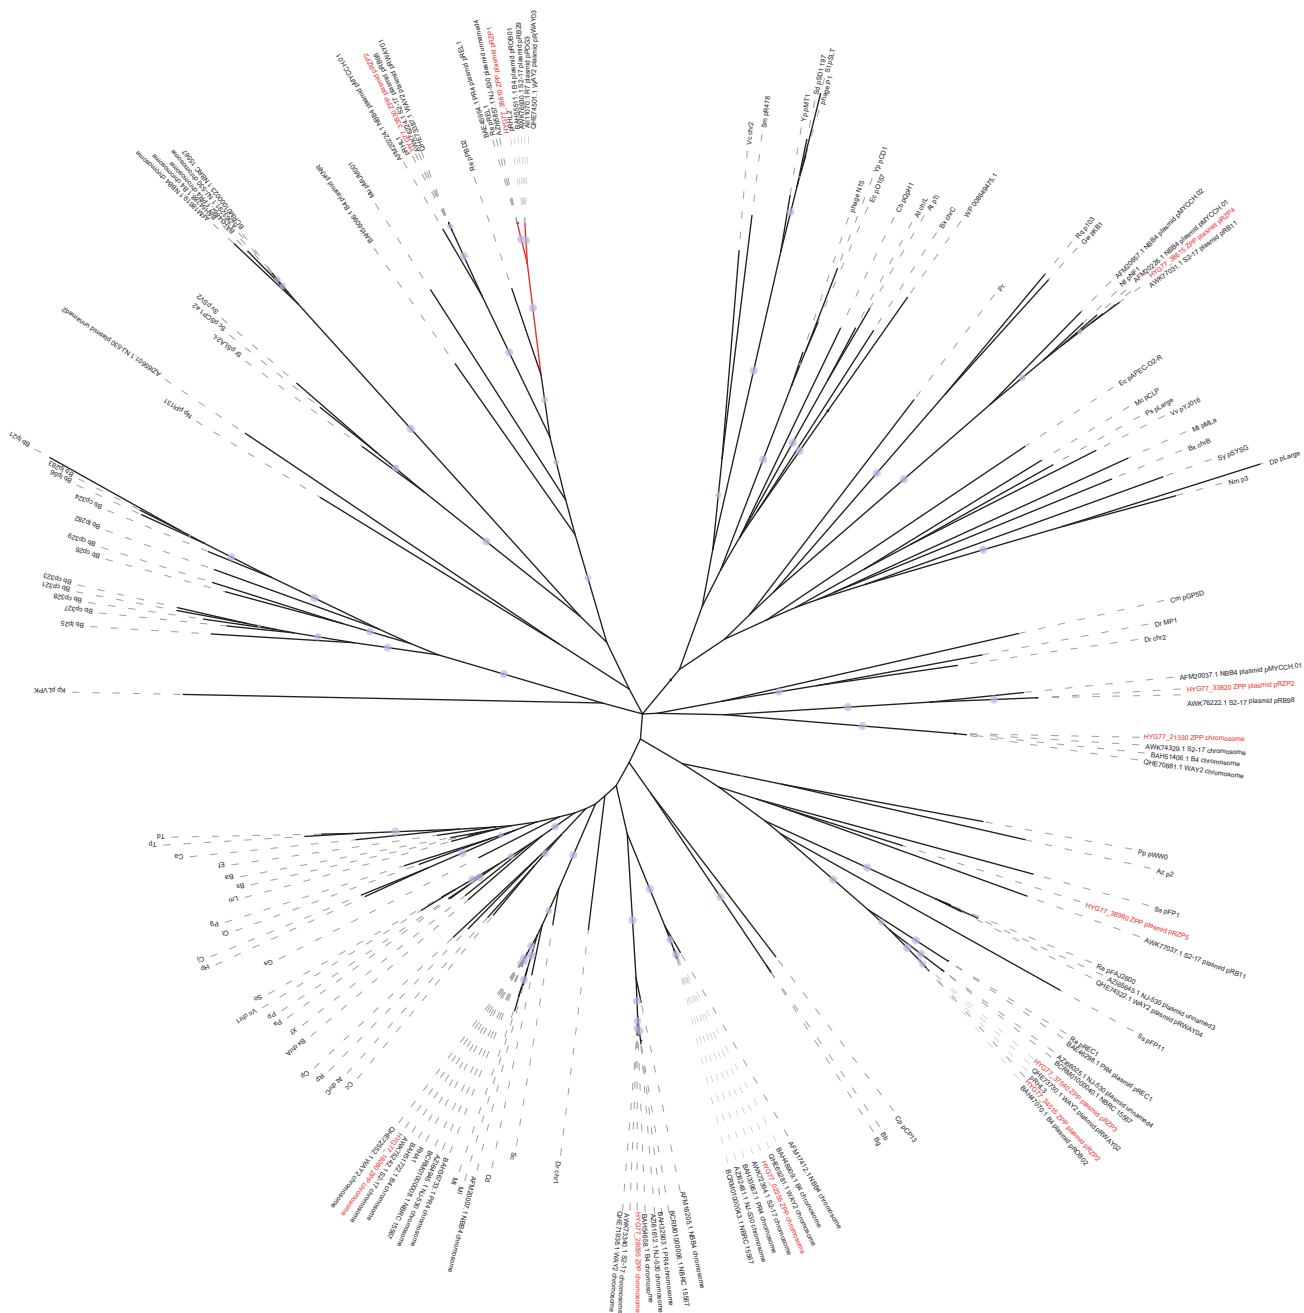

Fig. S5 Phylogenetic tree of ParA proteins. Proteins were aligned using Muscle with default parameters and 100 bootstraps with 95% partial deletion. A maximum likelihood tree was constructed using MEGA X. Nodes whose bootstraps  $\geq 60$  are colored in purple. The branch of pRZP1 is colored in red. Genomes related to this study are labelled with their accession numbers. The tree was based on Supporting Figure 3 of a previous study (2).

Fig. S6

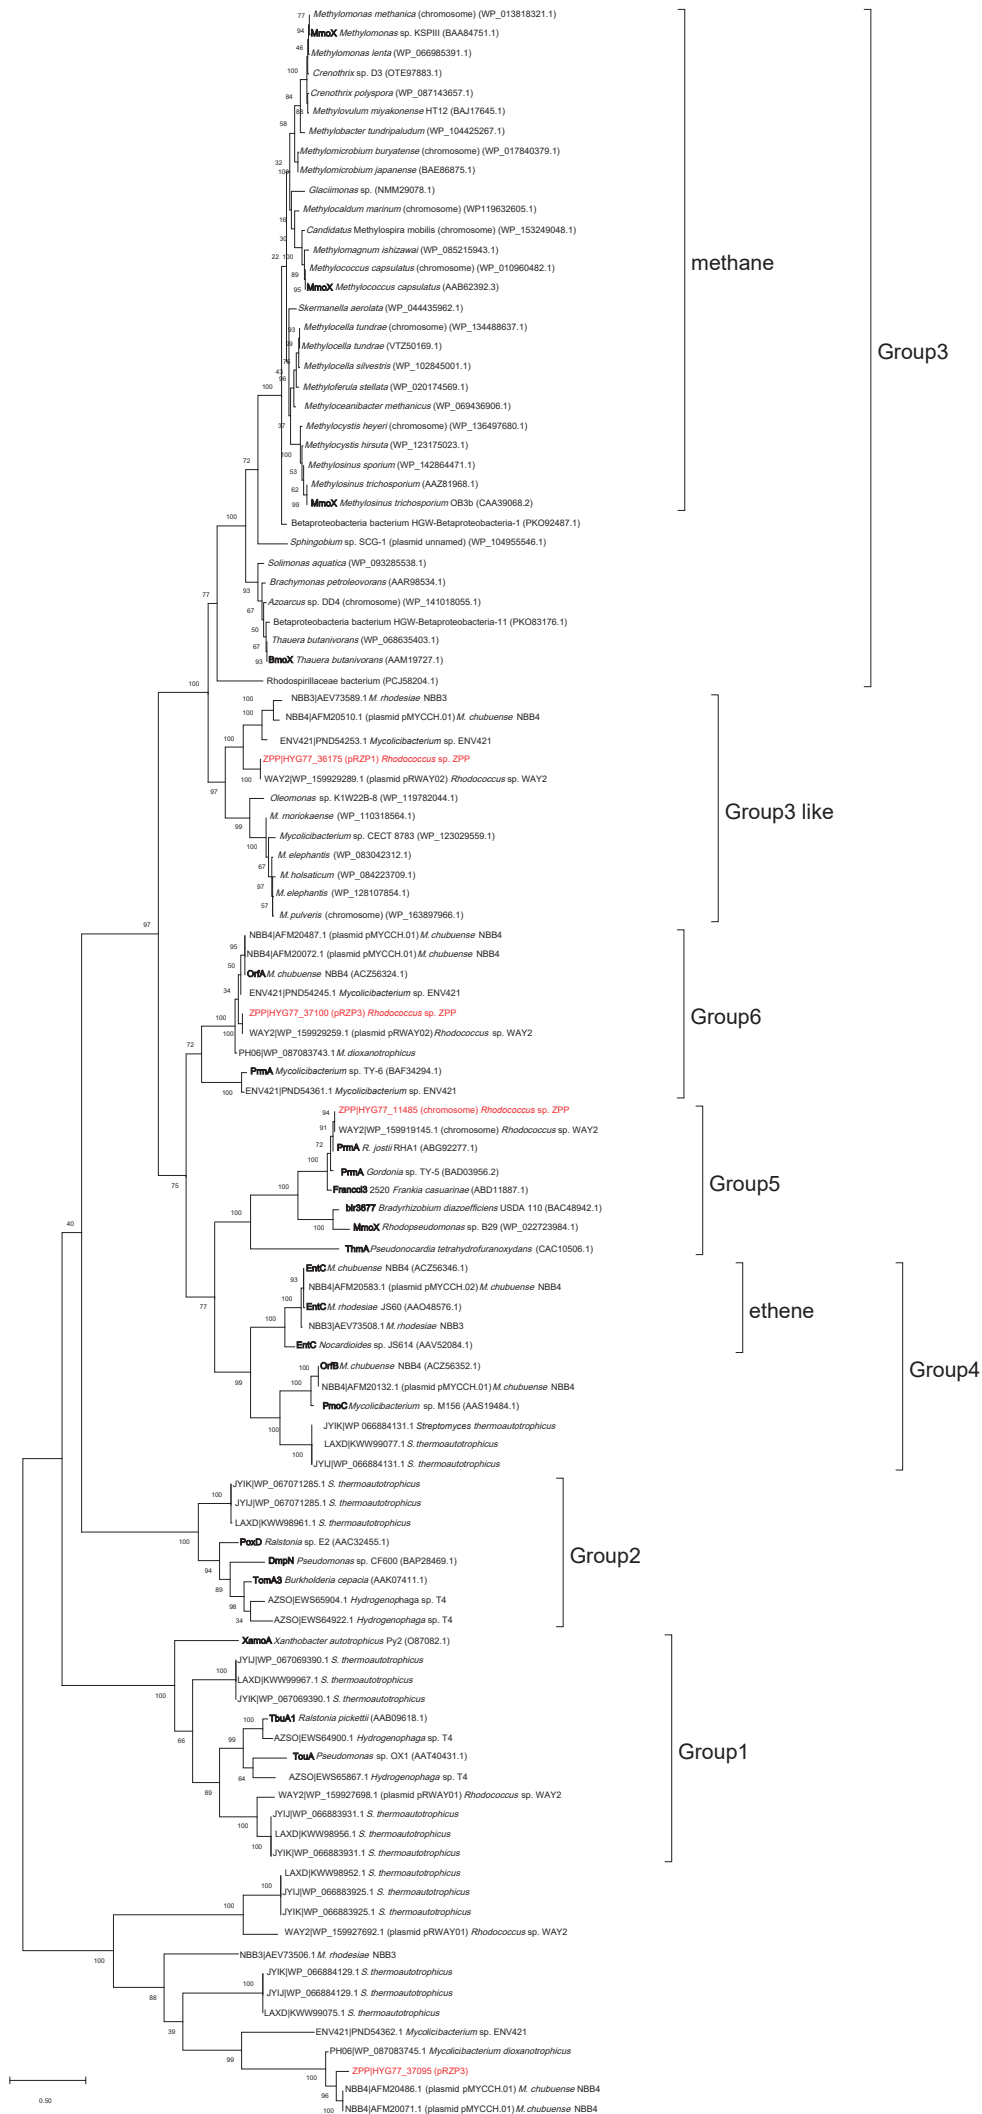

Fig. S6. Phylogenetic tree of *smoXYB1C1Z*-encoding group 3-like soluble di-iron monooxygenases (SDIMO) subunit  $\alpha$ . MEGA X was used to build the maximum likelihood tree. The number of bootstraps was 100, and the partial deletion was set to 95%. The sequence that has a pipe-delimited name is the sequence appearing in the HmoA tree (Fig. 3). The marker (chromosome) indicates that the gene is located on the chromosome, and the marker (plasmid) indicates that it is located on the plasmid. The tree was based on previous work and text in bold indicates that these sequences were extracted from that study (3).

Fig. S7

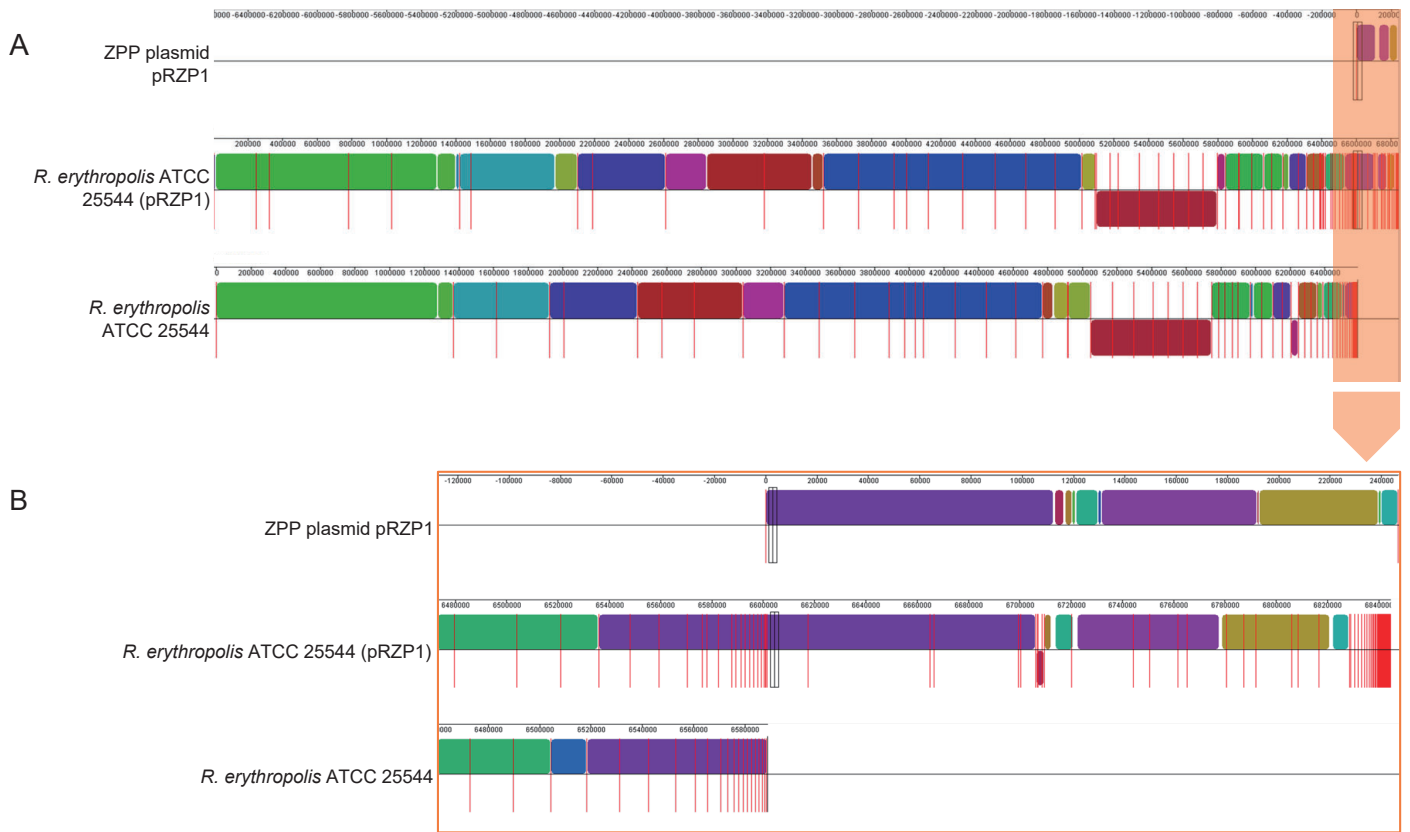

Fig. S7. Genomic comparison of *Rhodococcus* sp. ZPP plasmid pRZP1, ATCC 25544 (pRZP1), and ATCC 25544 (NCBI Assembly ID: GCA\_001552595.1). (A) is the entire genomic alignment and (B) is the region of pRZP1.

Fig. S8

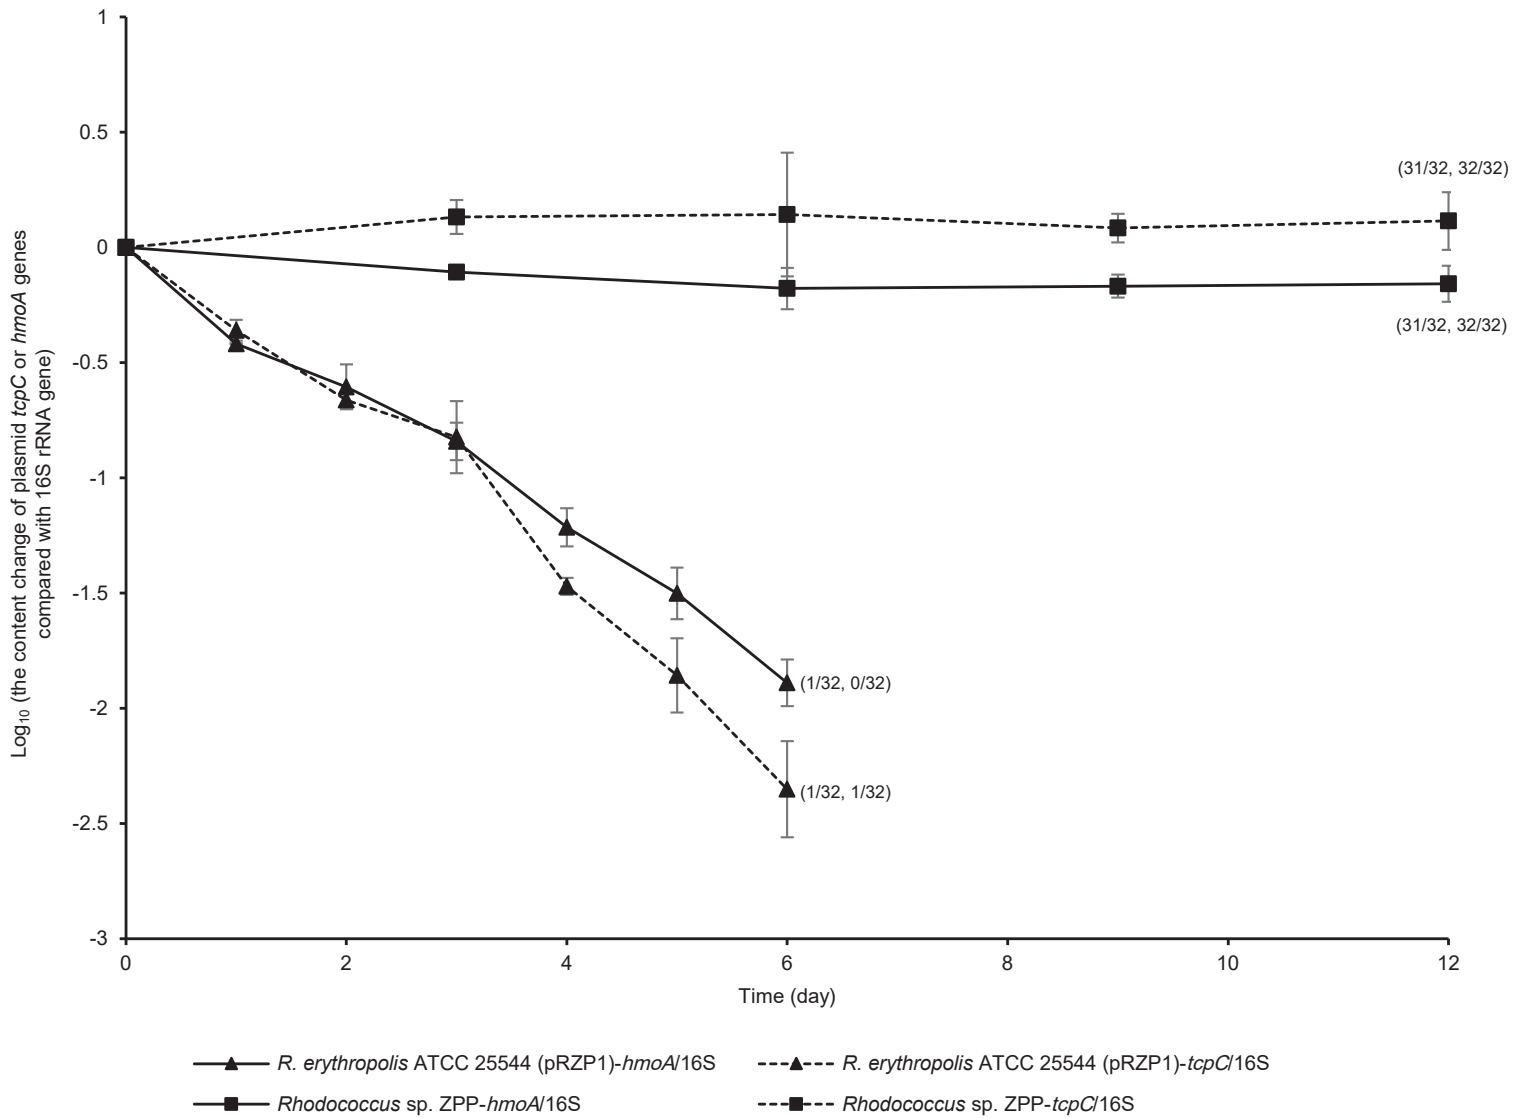

Fig. S8. Plasmid loss of wild-type ZPP and the transconjugant ATCC 25544 (pRZP1) using quantitative PCR (qPCR). The curves show the logarithm of the content change of plasmid *tcpC* or *hmoA* genes compared with 16S rRNA gene over time. Data are the average of two independent experiments, and error bars indicate 1 standard deviation. After culture, dilution plating was performed and 32 single colonies of each culture were selected to verify plasmid loss with the same primers. The number of colonies with positive PCR result for plasmid *tcpC* or *hmoA* genes is shown on the right side of the corresponding curve.

Fig. S9

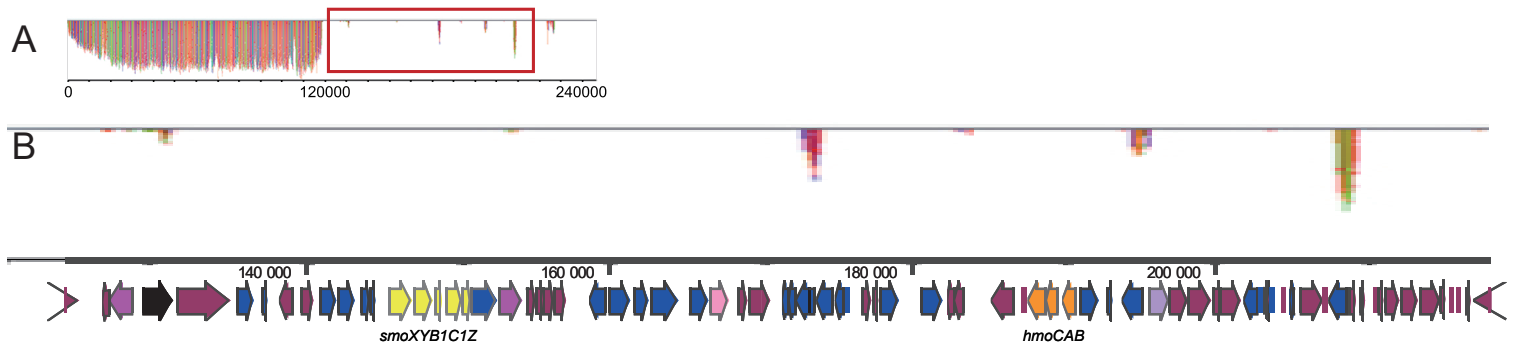

Fig. S9. Burrows-Wheeler Aligner (BWA) mapping result of genomic sequencing of ZPP on plasmid pRZP1  $\Delta(smoXYB1C1Z-hmoCAB)$  (A) and its detailed mapping in *smoXYB1C1Z-hmoCAB* region (B). The bar chart shows the coverage of each position. In (B), the SDIMO gene (*smoXYB1C1Z*) clusters are marked in yellow, and the CuMMO gene (*hmoCAB*, *amoCAB* and *pmoCAB*) clusters are marked in orange. The alcohol dehydrogenase genes (*adh*) are marked in light pink; the NDMA-dependent methanol dehydrogenase genes (*mdh*) are marked in purple; the aldehyde dehydrogenase genes (*aldH*) are marked in pink; the acetate-CoA ligase gene (*acs*) is marked in black and the mobile elements (including *IS* elements, transposases, and phages) are marked in blue.

## References

1. Darling AC, Mau B, Blattner FR, Perna NT. 2004. Mauve: multiple alignment of conserved genomic sequence with rearrangements. *Genome Res* 14:1394-403.
2. McLeod MP, Warren RL, Hsiao WWL, Araki N, Myhre M, Fernandes C, Miyazawa D, Wong W, Lillquist AL, Wang D, Dosanjh M, Hara H, Petrescu A, Morin RD, Yang G, Stott JM, Schein JE, Shin H, Smailus D, Siddiqui AS, Marra MA, Jones SJM, Holt R, Brinkman FSL, Miyauchi K, Fukuda M, Davies JE, Mohn WW, Eltis LD. 2006. The complete genome of *Rhodococcus* sp. RHA1 provides insights into a catabolic powerhouse. *Proc Natl Acad Sci USA* 103:15582.
3. Holmes AJ. 2009. The diversity of soluble di-iron monooxygenases with bioremediation applications, p 91-102. *In* Singh A, Kuhad RC, Ward OP (ed), *Advances in Applied Bioremediation* doi:10.1007/978-3-540-89621-0\_5. Springer Berlin Heidelberg, Berlin, Heidelberg.
